# Supplementary material for: Near-Infrared Light Triggered the Shape Memory Behavior of Polydopamine-Nanoparticle-Filled Epoxy Acrylate
Source: MDPI journal article supplement (doi:10.3390/polym15163394), 2023-08-13
Supplement: s1 [file s1]

## Supporting Information

### Near-Infrared Light Triggered the Shape Memory Behavior of Polydopamine-Nanoparticles-Filled Epoxy Acrylate

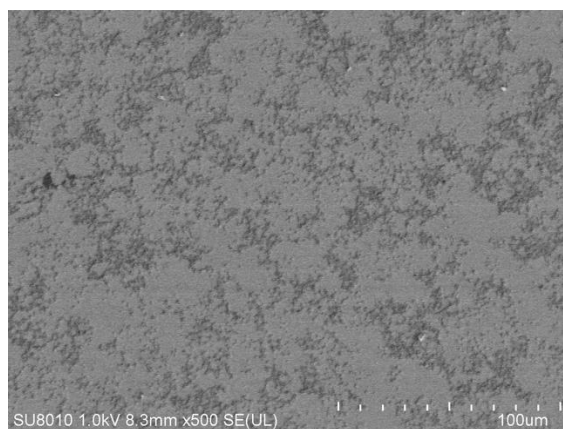

**Figure S1.** SEM image of the fracture surface of UV-cured EA/PDA polymer.

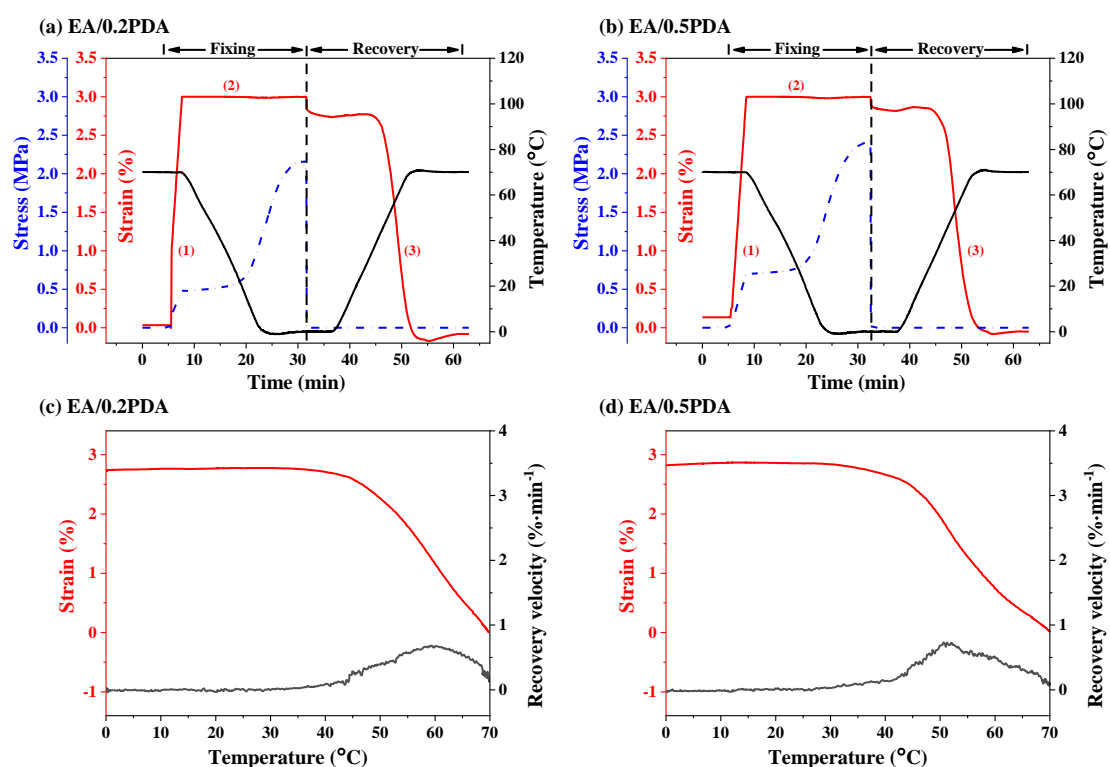

**Figure S2.** SM thermomechanical cycle tests of UV-cured EA/PDA polymers.

(a) EA/0.2PDA,  $\varepsilon_m=3.0\%$  and (b) EA/0.5PDA,  $\varepsilon_m=3.0\%$ . Shape recovery velocity as a function of temperature for (c) EA/0.2PDA and (d) EA/0.5PDA.
